# Supplementary material
Source: publisher figshare collection journal article supplement (https://acs.figshare.com/ndownloader/files/28864294)
Supplement: Supplementary file 1 [file 28864294]

## Supporting Information

### **Comparison of Energy Consumption of Osmotically Assisted Reverse Osmosis and Low-Salt-Rejection Reverse Osmosis for Brine Management**

Zhangxin Wang<sup>a,b</sup>, Dejun Feng<sup>a</sup>, Yuanmiaoliang Chen<sup>c</sup>, and Di He<sup>a,b,\*</sup>,  
Menachem Elimelech<sup>d,\*</sup>

<sup>a</sup>*Institute of Environmental and Ecological Engineering, Guangdong University of Technology, Guangzhou, Guangdong 510006, China*

<sup>b</sup>*Southern Marine Science and Engineering Guangdong Laboratory (Guangzhou), Guangzhou, 511458, China*

<sup>c</sup>*NUS Graduate School for Integrative Science and Engineering, National University of Singapore, Singapore, 117456, Singapore*

<sup>d</sup>*Department of Chemical and Environmental Engineering, Yale University, New Haven, Connecticut 06511, United States*

Number of Pages: 15

Number of Tables: 6

Number of Figures: 5

Corresponding author: email: [di.he@gdut.edu.cn](mailto:di.he@gdut.edu.cn);  
[menachem.elimelech@yale.edu](mailto:menachem.elimelech@yale.edu); Tel. +1 (203) 432-2789

## Derivation of Equations 1 and 2

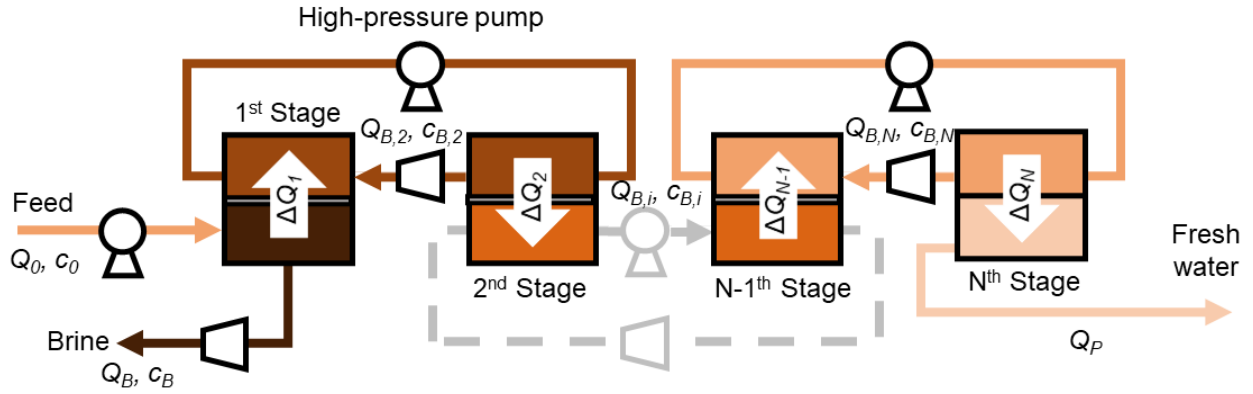

**Figure S1.** Schematic of an N-stage OARO.

In an N-stage OARO (Figure S1), following the working principle of RO (i.e.,  $\Delta\pi \leq \Delta P$ ), we can calculate the maximum osmotic pressure of the concentrated brine out of the last stage ( $\pi_{B,N,max}$ )

$$\pi_{B,N,max} = \Delta P_{max} \quad (S1)$$

where,  $\Delta P_{max}$  is the maximum operating pressure in the system.

After going through an energy recovery device (ERD), the concentrated brine out of the N<sup>th</sup> stage serves as the unpressurized stream in the N-1<sup>th</sup> stage. Then, the maximum osmotic pressure of the concentrated brine out of the N-1<sup>th</sup> stage ( $\pi_{B,N-1,max}$ ) can be obtained:

$$\pi_{B,N-1,max} = \pi_{B,N,max} + \Delta P_{max} = 2\Delta P_{max} \quad (S2)$$

Likewise, we can obtain the osmotic pressure of the final concentrated brine out of the 1<sup>st</sup> stage ( $\pi_{B,max}$ )

$$\pi_{B,max} = N\Delta P_{max} \quad (S3)$$

According to van't Hoff's approximation,<sup>1, 2</sup> the osmotic pressure of a solution is proportional to the solution concentration. Given the feed concentration ( $c_0$ ) and feed osmotic pressure ( $\pi_0$ ), we can estimate  $c_{B,max}$  from  $\pi_{B,max}$ :

$$c_{B,max} = \frac{\pi_{B,max} c_0}{\pi_0} \quad (S4)$$

Combing eqs S3 and S4 yields

$$c_{B,max} = \frac{N\Delta P_{max} c_0}{\pi_0} \quad (S5)$$

We note that eq S5 is eq 2a in the paper.

Based on mass balance of salts in the OARO system, the minimum flow rate of the final brine ( $Q_{B,min}$ ) can be calculated:

$$Q_{B,min} = \frac{c_0 Q_0}{c_{B,max}} \quad (S6)$$

where  $Q_0$  is the feed flow rate.

Then, we can calculate the maximum water recovery ( $R_{w,max}$ ) as

$$R_{w,max} = \frac{Q_{P,max}}{Q_0} = \frac{Q_0 - Q_{B,min}}{Q_0} \quad (S7)$$

Substituting eq S6 into eq S7 yields

$$R_{w,max} = 1 - \frac{c_0}{c_{B,max}} \quad (S8)$$

Combing eqs S5 and S8 gives

$$R_{w,max} = 1 - \frac{\pi_0}{N\Delta P_{max}} \quad (S9)$$

We note that eqs S8 and S9 are eqs 1 and 2b in the paper, respectively.

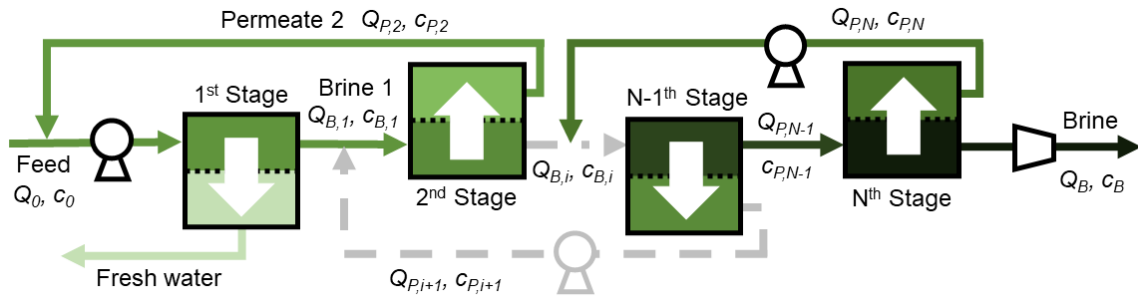

**Figure S2.** Schematic of an N-stage LSRRO

In an N-stage LSRRO, following the working principle of RO, the maximum osmotic pressure of the brine out of the 1<sup>st</sup> stage ( $\pi_{B,1,max}$ ) can be obtained from the maximum operating pressure ( $\Delta P_{max}$ ):

$$\pi_{B,1,max} = \Delta P_{max} \quad (S10)$$

As the brine out of the 1<sup>st</sup> stage serves as the feed in the 2<sup>nd</sup> stage, the maximum osmotic pressure of the permeate stream out of the 2<sup>nd</sup> stage ( $\pi_{P,2,max}$ ) is capped by  $\pi_{B,1,max}$ . Then, the maximum osmotic pressure of the brine out of the 2<sup>nd</sup> stage ( $\pi_{B,2,max}$ ) can be obtained:

$$\pi_{B,2,max} = \pi_{P,2,max} + \Delta P_{max} = 2\Delta P_{max} \quad (S11)$$

Likewise, the maximum osmotic pressure of the final brine out of the N<sup>th</sup> stage ( $\pi_{B,max}$ ) can be calculated:

$$\pi_{B,max} = N\Delta P_{max} \quad (S12)$$

Note that eq S11 is the same as eq S4, and eqs S5 to S9 apply to both OARO and LSRRO. Therefore, in an N-stage LSRRO, eqs 1 and 2 in the paper still hold.

## Calculation of *SEC* in N-stage OARO

Following the working principle of OARO (Figure S1), in steady-state operation, the permeate flux rate in each stage ( $\Delta Q$ ) is constant,<sup>3</sup>

$$\Delta Q_1 = \Delta Q_2 = \dots = \Delta Q_i = \dots = Q_P \quad (\text{S13})$$

where  $Q_P$  is the permeate flow rate.

By definition, the specific energy consumptions of the  $i^{\text{th}}$  stage ( $SEC_i$ ) in an N-stage OARO is

$$SEC_i = \frac{Q_{P,i} \Delta P_i}{Q_P} = \Delta P_i \quad (\text{S14})$$

where  $\Delta P_i$  is the operating pressure in the  $i^{\text{th}}$  stage. The *SEC* of an N-stage OARO is the sum of  $SEC_i$ :

$$SEC = \sum_{i=1}^N SEC_i = \sum_{i=1}^N \Delta P_i \quad (\text{S15})$$

According to the working principle of RO, in the bilateral RO stages,  $\Delta P_i$  is equal to the product of the transmembrane osmotic pressure difference at the outlet of the concentrated brine ( $\Delta \pi_i = \pi_{B,i} - \pi_{B,i+1}$ ) and overpressurization factor ( $k$ ):

$$\Delta P_i = k \Delta \pi_i = k (\pi_{B,i} - \pi_{B,i+1}) \quad (\text{S16})$$

In the last conventional RO stage,  $\Delta P_N$  is equal to the product of  $k$  and  $\pi_{B,N}$ :

$$\Delta P_N = k \pi_{B,N-1} \quad (\text{S17})$$

Substituting eqs S16 and S17 into eq S14 yields

$$SEC = k \pi_B \quad (\text{S18})$$

where  $\pi_B$  is the osmotic pressure of the final brine out of the 1<sup>st</sup> stage. Based on the van't Hoff approximation, *SEC* for an N-stage OARO can be calculated as

$$SEC = k v R T c_B \quad (\text{S19})$$

where  $k$  is the overpressurization factor;  $v$  is a dimensionless van't Hoff index (e.g.,  $v=2$  for NaCl);  $R$  is the gas constant;  $T$  is the absolute temperature; and  $c_B$  is the molar concentration of the final brine out of the 1<sup>st</sup> stage.

Throughout this study,  $T$  was assumed to be 298 K because RO systems in the industry are usually rated at 25 °C (298 K). We note that the brine temperature in RO systems could vary during operation.<sup>4</sup> However, based on the van't Hoff approximation, even if the brine temperature varies by 10 K, the resulting variation of the calculated osmotic pressure would be only ~3 %. Such small variation would not influence the modeling results and conclusions of our study. In addition, since the impact of  $T$  on the osmotic pressure would be the same for OARO and LSRRO, the choice of  $T$  would not alter the results for the comparison between OARO and LSRRO.

## Calculation of SEC in Two-stage LSRRO

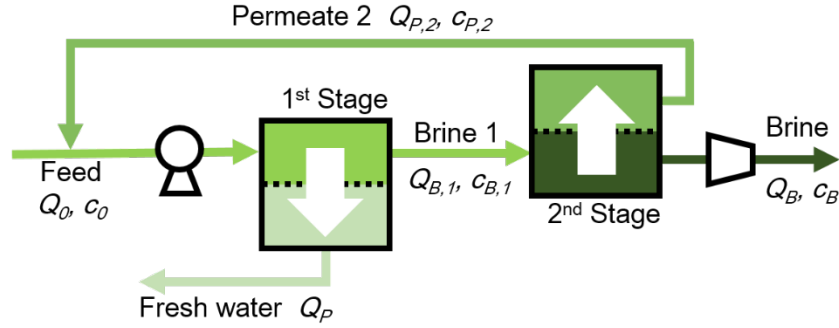

**Figure S3.** Schematic of a two-stage LSRRO.

In a two-stage LSRRO (Figure S3), a mass balance of salts yields

$$c_0 Q_0 = c_B Q_B \quad (S20)$$

$$c_0 Q_0 + c_{P,2} Q_{P,2} = c_{B,1} Q_{B,1} \quad (S21)$$

where  $c_0$  and  $Q_0$  are the molar concentration and volume flow rate of the feed, respectively;  $c_B$  and  $Q_B$  are the molar concentration and volume flow rate of the final brine, respectively;  $c_{P,2}$  and  $Q_{P,2}$  are the molar concentration and volume flow rate of permeate 2, respectively; and  $c_{B,1}$  and  $Q_{B,1}$  are the molar concentration and volume flow rate of brine 1, respectively.

Based on mass balance of water, we can obtain

$$Q_0 = Q_B + Q_P \quad (S22)$$

$$Q_{B,1} = Q_B + Q_{P,2} \quad (S23)$$

where  $Q_P$  is the flow rate of produced freshwater.

From the definition of observed salt rejection,<sup>5,6</sup> we can get

$$\frac{c_{P,2}}{c_{B,1}} = 1 - r_2 \quad (S24)$$

where,  $r_2$  is the observed salt rejection in the 2<sup>nd</sup> stage.

Following the working principle of RO (i.e.,  $\Delta\pi = \Delta P$ ) and van't Hoff's approximation, we can attain

$$c_{B,1} = \frac{\Delta P}{k v R T} \quad (S25)$$

$$c_B = c_{P,2} + \frac{\Delta P}{k v R T} \quad (S26)$$

where,  $k$  is the overpressurization factor;  $v$  is a dimensionless van't Hoff index (e.g.,  $v=2$  for NaCl);  $R$  is the gas constant;  $T$  is the absolute temperature.

Given  $\Delta P$ ,  $k$ ,  $c_0$ ,  $Q_0$ , and  $r_2$ , we can attain  $Q_{P,2}$  and  $Q_P$  from solving eqs (S20) to (S26). Then,  $SEC$  can be calculated based on its definition:<sup>7</sup>

$$SEC = (1 + \frac{Q_{P,2}}{Q_P})\Delta P \quad (S27)$$

We note that the  $SEC$  of two-stage LSRRO reported in this study is the minimum  $SEC$  after optimization. The optimization is performed by varying  $\Delta P$  and  $r_2$  in the calculation for a target  $c_B$  (i.e.,  $c_B = 2.4$  M or 140,000 mg/L TDS for MLD in our study). The target  $c_B$  can be achieved by different combinations of  $\Delta P$  and  $r_2$ , and each combination results in a different  $SEC$ . The minimum  $SEC$  was selected from all the resulting  $SEC$ , and the corresponding  $\Delta P$  and  $r_2$  are shown in Table S1.



## Calculation of SEC in Three-stage LSRRO

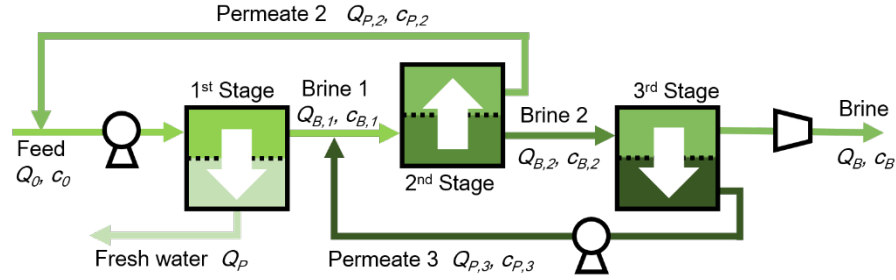

**Figure S4.** Schematic of a three-stage LSRRO

In a three-stage LSRRO (Figure S4), a mass balance of salts yields

$$c_0 Q_0 = c_B Q_B \quad (S28)$$

$$c_0 Q_0 + c_{P,2} Q_{P,2} = c_{B,1} Q_{B,1} \quad (S29)$$

$$c_{B,1} Q_{B,1} + c_{P,3} Q_{P,3} = c_{B,2} Q_{B,2} + c_{P,2} Q_{P,2} \quad (S30)$$

where  $c_0$  and  $Q_0$  are the molar concentration and volume flow rate of the feed, respectively;  $c_B$  and  $Q_B$  are the molar concentration and volume flow rate of the final brine, respectively;  $c_{P,i}$  and  $Q_{P,i}$  are the molar concentration and volume flow rate of permeate  $i$ , respectively;  $c_{B,i}$  and  $Q_{B,i}$  are the molar concentration and volume flow rate of brine  $i$ , respectively.

Based on the mass balance of water, we can get

$$Q_0 = Q_B + Q_P \quad (S31)$$

$$Q_{B,1} = Q_B + Q_{P,2} \quad (S32)$$

$$Q_{B,2} = Q_B + Q_{P,3} \quad (S33)$$

where  $Q_P$  is the flow rate of fresh water.

From the definition of observed salt rejection, we can attain

$$\frac{c_{P,2}}{(c_{B,1} Q_{B,1} + c_{P,3} Q_{P,3}) / (Q_{B,1} + Q_{P,3})} = 1 - r_2 \quad (S34)$$

$$\frac{c_{P,3}}{c_{B,2}} = 1 - r_3 \quad (S35)$$

where,  $r_i$  is the observed salt rejection of the  $i^{\text{th}}$  stage.

Following the working principle of RO and van't Hoff's approximation, we can obtain

$$c_{B,1} = \frac{\Delta P}{k v R T} \quad (S36)$$

$$c_{B,2} = c_{P,2} + \frac{\Delta P}{k v R T} \quad (S37)$$

$$c_B = c_{P,3} + \frac{\Delta P}{k\nu RT} \quad (\text{S38})$$

where,  $k$  is the overpressurization factor;  $\nu$  is a dimensionless van't Hoff index (e.g.,  $\nu=2$  for NaCl);  $R$  is the gas constant;  $T$  is the absolute temperature.

Given  $\Delta P$ ,  $k$ ,  $c_0$ ,  $Q_0$ ,  $r_2$ , and  $r_3$ , we can obtain  $Q_{P,2}$ ,  $Q_{P,3}$ , and  $Q_P$  from solving eqs (S28) to (S38). Then,  $SEC$  can be calculated based on its definition:<sup>7</sup>

$$SEC = (1 + \frac{Q_{P,2}}{Q_P} + \frac{Q_{P,3}}{Q_P})\Delta P \quad (\text{S39})$$

The  $SEC$  of three-stage LSRRO reported in this study is the minimum  $SEC$  after optimization. The optimization is performed by varying  $\Delta P$ ,  $r_2$ , and  $r_3$  in the calculation for a target  $c_B$  (i.e.,  $c_B = 4$  M or 234,000 mg/L TDS for ZLD in our study). The target  $c_B$  can be achieved from different combinations of  $\Delta P$ ,  $r_2$ , and  $r_3$ , and each combination results in a different  $SEC$ . The minimum  $SEC$  was selected from all the resulting  $SEC$ , and the corresponding  $\Delta P$ ,  $r_2$ , and  $r_3$  are shown in Tables S2 and S3.

## Calculation of SEC in Four-stage LSRRO

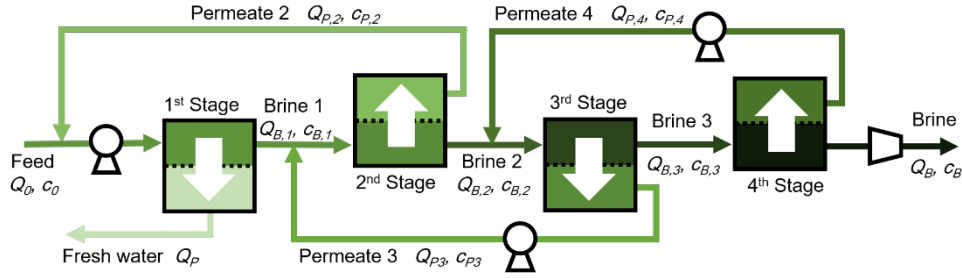

**Figure S5.** Schematic of a four-stage LSRRO

In a four-stage LSRRO (Figure S5), mass balance of salts yields

$$c_0 Q_0 = c_B Q_B \quad (S40)$$

$$c_0 Q_0 + c_{P,2} Q_{P,2} = c_{B,1} Q_{B,1} \quad (S41)$$

$$c_{B,1} Q_{B,1} + c_{P,3} Q_{P,3} = c_{B,2} Q_{B,2} + c_{P,2} Q_{P,2} \quad (S42)$$

$$c_{B,2} Q_{B,2} + c_{P,4} Q_{P,4} = c_{B,3} Q_{B,3} + c_{P,3} Q_{P,3} \quad (S43)$$

where  $c_0$  and  $Q_0$  are the molar concentration and volume flow rate of the feed, respectively,  $c_B$  and  $Q_B$  are the molar concentration and volume flow rate of the final brine, respectively,  $c_{P,i}$  and  $Q_{P,i}$  are the molar concentration and volume flow rate of the final brine, respectively,  $c_{B,1}$  and  $Q_{B,1}$  are the molar concentration and volume flow rate of brine i, respectively.

Based on mass balance of water, we can get

$$Q_0 = Q_B + Q_P \quad (S44)$$

$$Q_{B,1} = Q_B + Q_{P,2} \quad (S45)$$

$$Q_{B,2} = Q_B + Q_{P,3} \quad (S46)$$

$$Q_{B,3} = Q_B + Q_{P,4} \quad (S47)$$

where  $Q_P$  is the flow rate of fresh water.

According to the definition of observed salt rejection, we can attain

$$\frac{c_{P,2}}{(c_{B,1} Q_{B,1} + c_{P,3} Q_{P,3}) / (Q_{B,1} + Q_{P,3})} = 1 - r_2 \quad (S48)$$

$$\frac{c_{P,3}}{(c_{B,2} Q_{B,2} + c_{P,4} Q_{P,4}) / (Q_{B,2} + Q_{P,4})} = 1 - r_3 \quad (S49)$$

$$\frac{c_{P,4}}{c_{B,3}} = 1 - r_4 \quad (S50)$$

where,  $r_i$  is the observed salt rejection of the  $i^{\text{th}}$  stage.

Following the working principle of RO and van't Hoff's law, we can obtain

$$c_{B,1} = \frac{\Delta P}{k\nu RT} \quad (\text{S51})$$

$$c_{B,2} = c_{P,2} + \frac{\Delta P}{k\nu RT} \quad (\text{S52})$$

$$c_{B,3} = c_{P,3} + \frac{\Delta P}{k\nu RT} \quad (\text{S53})$$

$$c_B = c_{P,4} + \frac{\Delta P}{k\nu RT} \quad (\text{S54})$$

where  $k$  is overpressurization factor,  $\nu$  is a dimensionless van't Hoff index (e.g.,  $\nu=2$  for NaCl);  $R$  is the gas constant;  $T$  is the absolute temperature.

Given  $\Delta P$ ,  $k$ ,  $c_0$ ,  $Q_0$ ,  $r_2$ ,  $r_3$ , and  $r_4$ , we can obtain  $Q_{P,2}$ ,  $Q_{P,3}$ ,  $Q_{P,4}$ , and  $Q_P$  from solving eqs (S40) to (S54). Then,  $SEC$  can be calculated based on its definition:<sup>7</sup>

$$SEC = (1 + \frac{Q_{P,2}}{Q_P} + \frac{Q_{P,3}}{Q_P} + \frac{Q_{P,4}}{Q_P})\Delta P \quad (\text{S55})$$

The  $SEC$  of four-stage LSRRO reported in this study is the minimum  $SEC$  after optimization. The optimization is performed by varying  $\Delta P$ ,  $r_2$ ,  $r_3$ , and  $r_4$  in the calculation for a target  $c_B$  (i.e.,  $c_B = 4$  M or 234,000 mg/L TDS for ZLD in our study). The target  $c_B$  can be achieved from different combinations of  $\Delta P$ ,  $r_2$ ,  $r_3$ , and  $r_4$ , and each combination results in a different  $SEC$ . The minimum  $SEC$  was selected from all the resulting  $SEC$ , and the corresponding  $\Delta P$ ,  $r_2$ ,  $r_3$ , and  $r_4$  are shown in Table S2.

## Operating Conditions and *SEC* of OARO

Table S1. Operating pressures and *SEC* of two-stage OARO for MLD with a  $\Delta P_{max}$  of 80 bar

| Stage Number                      | 2      | 2      | 2      |
|-----------------------------------|--------|--------|--------|
| $c_0$ (mg/L TDS)                  | 10,000 | 35,000 | 70,000 |
| $\Delta P_1$ (bar)                | 65.4   | 65.4   | 65.4   |
| $\Delta P_2$ (bar)                | 65.4   | 65.4   | 65.4   |
| <i>SEC</i> (kWh m <sup>-3</sup> ) | 3.63   | 3.63   | 3.63   |

Table S2. Operating pressures and *SEC* of three-stage and four-stage OARO for ZLD with a  $\Delta P_{max}$  of 80 bar

| Stage Number                      | 3      | 4      | 3      | 4      | 3      | 4      |
|-----------------------------------|--------|--------|--------|--------|--------|--------|
| $c_0$ (mg/L TDS)                  | 10,000 | 10,000 | 35,000 | 35,000 | 70,000 | 70,000 |
| $\Delta P_1$ (bar)                | 72.7   | 54.5   | 72.7   | 54.5   | 72.7   | 54.5   |
| $\Delta P_2$ (bar)                | 72.7   | 54.5   | 72.7   | 54.5   | 72.7   | 54.5   |
| $\Delta P_3$ (bar)                | 72.7   | 54.5   | 72.7   | 54.5   | 72.7   | 54.5   |
| $\Delta P_4$ (bar)                | -      | 54.5   | -      | 54.5   | -      | 54.5   |
| <i>SEC</i> (kWh m <sup>-3</sup> ) | 6.06   | 6.06   | 6.06   | 6.06   | 6.06   | 6.06   |

Table S3. Operating pressures and *SEC* of three-stage OARO for ZLD with a  $\Delta P_{max}$  of 120 bar

| Stage Number                      | 3      | 3      | 3      |
|-----------------------------------|--------|--------|--------|
| $c_0$ (mg/L TDS)                  | 10,000 | 35,000 | 70,000 |
| $\Delta P_1$ (bar)                | 72.7   | 72.7   | 72.7   |
| $\Delta P_2$ (bar)                | 72.7   | 72.7   | 72.7   |
| $\Delta P_3$ (bar)                | 72.7   | 72.7   | 72.7   |
| <i>SEC</i> (kWh m <sup>-3</sup> ) | 6.06   | 6.06   | 6.06   |

## Optimization Results of *SEC* in LSRRO

Table S4. Detailed information about the salt rejections and applied pressures to achieve  $SEC_{min}$  in two-stage LSRRO for MLD with a  $\Delta P_{max}$  of 80 bar

| Stage Number                 | 2      | 2      | 2      |
|------------------------------|--------|--------|--------|
| $c_0$ (mg/L TDS)             | 10,000 | 35,000 | 70,000 |
| $r_2$ (%)                    | 34     | 37     | 37     |
| $r_3$ (%)                    | -      | -      | -      |
| $r_4$ (%)                    | -      | -      | -      |
| $\Delta P$ (bar)             | 78.5   | 80     | 80     |
| $SEC$ (kWh m <sup>-3</sup> ) | 2.51   | 3.49   | 6.02   |

Table S5. Detailed information about the salt rejections and applied pressures to achieve  $SEC_{min}$  in three-stage and four-stage LSRRO for ZLD with a  $\Delta P_{max}$  of 80 bar

| Stage Number                 | 3      | 4      | 3      | 4      | 3      | 4      |
|------------------------------|--------|--------|--------|--------|--------|--------|
| $c_0$ (mg/L TDS)             | 10,000 | 10,000 | 35,000 | 35,000 | 70,000 | 70,000 |
| $r_2$ (%)                    | 32     | 48     | 32     | 46     | 32     | 46     |
| $r_3$ (%)                    | 7      | 30     | 7      | 30     | 7      | 30     |
| $r_4$ (%)                    | -      | 18     | -      | 19     | -      | 19     |
| $\Delta P$ (bar)             | 80     | 79.4   | 80     | 70     | 70     | 80     |
| $SEC$ (kWh m <sup>-3</sup> ) | 4.04   | 3.02   | 9.38   | 5.38   | 19.61  | 9.90   |

Table S6. Detailed information about the salt rejections and applied pressures to achieve  $SEC_{min}$  in three-stage LSRRO for ZLD with a  $\Delta P_{max}$  of 120 bar

| Stage Number                 | 3      | 3      | 3      |
|------------------------------|--------|--------|--------|
| $c_0$ (mg/L TDS)             | 10,000 | 35,000 | 70,000 |
| $r_2$ (%)                    | 43     | 55     | 53     |
| $r_3$ (%)                    | 20     | 43     | 44     |
| $\Delta P$ (bar)             | 94.6   | 119.7  | 119.9  |
| $SEC$ (kWh m <sup>-3</sup> ) | 3.28   | 4.54   | 6.26   |

## References

1. Murad, S.; Powles, J., A computer simulation of the classic experiment on osmosis and osmotic pressure. *The Journal of chemical physics* **1993**, 99, (9), 7271-7272.
2. Pitzer, K. S., Thermodynamics of Electrolytes .1. Theoretical Basis and General Equations. *J Phys Chem-Us* **1973**, 77, (2), 268-277.
3. Chen, X.; Yip, N. Y., Unlocking high-salinity desalination with cascading osmotically mediated reverse osmosis: Energy and operating pressure analysis. *Environmental science & technology* **2018**, 52, (4), 2242-2250.
4. Alrehaili, O.; Perreault, F.; Sinha, S.; Westerhoff, P., Increasing net water recovery of reverse osmosis with membrane distillation using natural thermal differentials between brine and co-located water sources: Impacts at large reclamation facilities. *Water Res* **2020**, 184.
5. Kwak, S. Y.; Kim, S. H.; Kim, S. S., Hybrid organic/inorganic reverse osmosis (RO) membrane for bactericidal anti-fouling. 1. Preparation and characterization of TiO<sub>2</sub> nanoparticle self-assembled aromatic polyamide thin-film-composite (TFC) membrane. *Environ Sci Technol* **2001**, 35, (11), 2388-2394.
6. Abbas, A.; Al-Bastaki, N., Performance decline in brackish water Film Tec spiral wound RO membranes. *Desalination* **2001**, 136, (1), 281-286.
7. Wang, Z.; Deshmukh, A.; Du, Y.; Elimelech, M., Minimal and zero liquid discharge with reverse osmosis using low-salt-rejection membranes. *Water Research* **2020**, 170, 115317.
